# Supplementary material for: Thin Film Biocomposite Membrane for Forward Osmosis Supported by Eggshell Membrane
Source: MDPI journal article supplement (doi:10.3390/membranes12020166), 2022-01-30
Supplement: s1 [file s1]

Supplementary Information

# Thin film Biocomposite Membrane for Forward Osmosis Supported by Eggshell Membrane

Teayeop Kim<sup>1,†</sup>, Sunho Park<sup>2,3,†</sup>, Yoonkyung Lee<sup>1</sup>, Jangho Kim<sup>2,3,\*</sup> and Kyunghoon Kim<sup>1,\*</sup>

<sup>1</sup> School of Mechanical Engineering, Sungkyunkwan University, Suwon 16419, Republic of Korea; skkty@skku.edu (T. K.), yi9257kr@skku.edu (Y.L.)

<sup>2</sup> Department of Rural and Biosystems Engineering, Chonnam National University, Gwangju 61186, Republic of Korea; preference9330@gmail.com (S. P.)

<sup>3</sup> Interdisciplinary Program in IT-Bio Convergence System, Chonnam National University, Gwangju, 61186, Republic of Korea

\* Correspondence: kenkim@skku.edu (K. K.), rain2000@jnu.ac.kr (J. K.).

† These authors equally contribute to this paper.

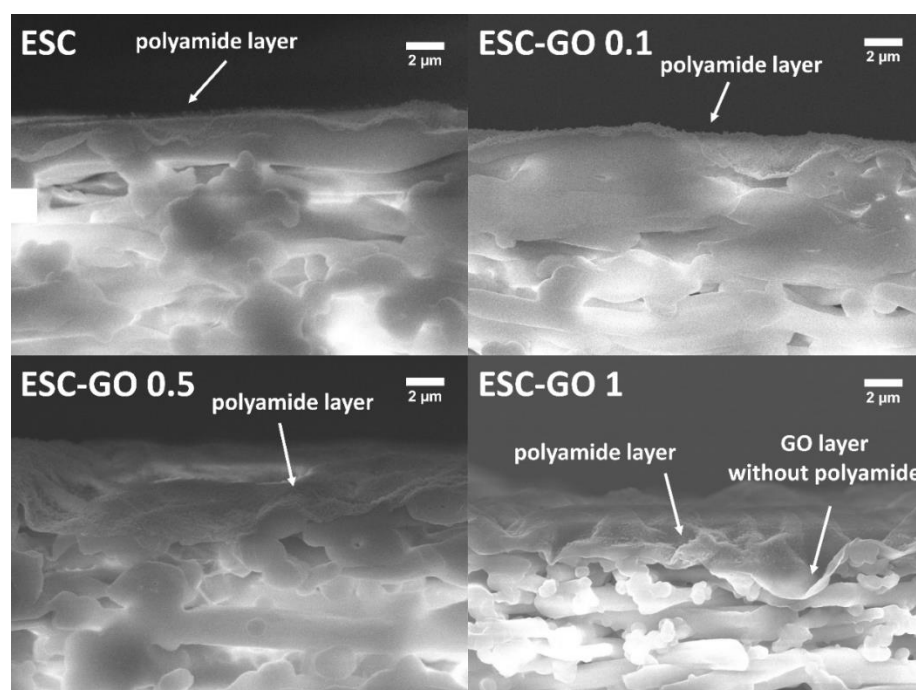

**Figure S1.** FESEM image of ESC and ESC-GO membranes at polyamide layer.

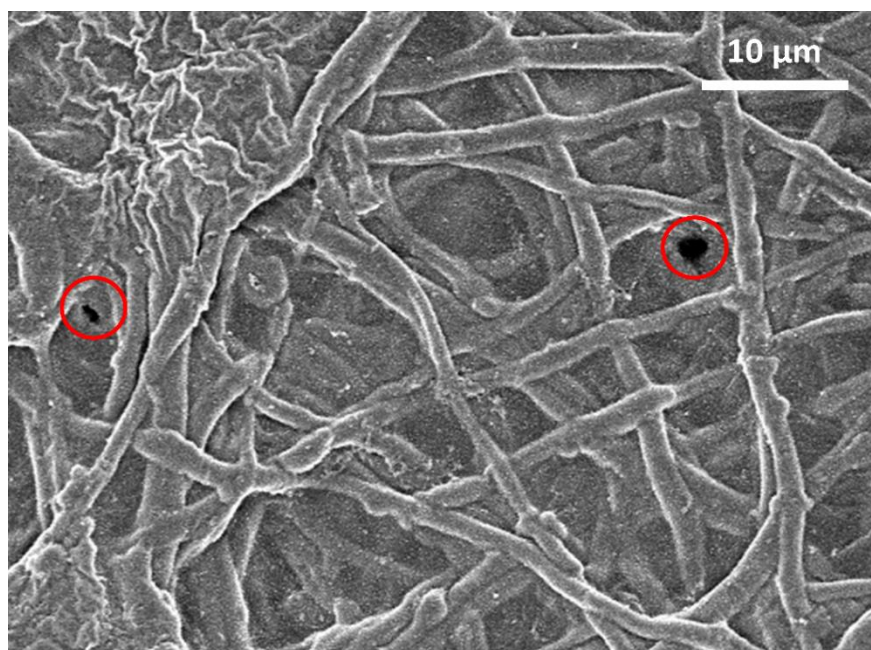

**Figure S2.** Defects at polyamide layer in ESC membranes.

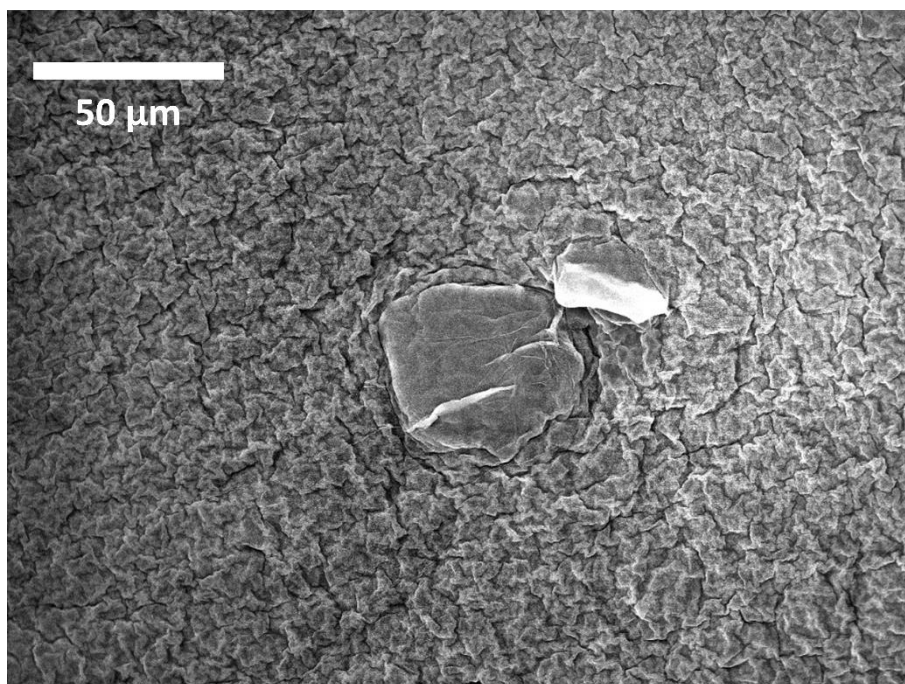

**Figure S3.** Large agglomeration of GO in ESM-GO 1.
